# Supplementary material
Source: publisher figshare collection journal article supplement (https://acs.figshare.com/ndownloader/files/5718051)

## Supporting Information

Figure 1S. Schematic illustration of the honeycomb-like layer. Capital letter A stands for a top-capped  $C_2@Ag_7$  cage,  $\bar{A}$  indicates a bottom-capped  $C_2@Ag_7$  cage, B presents a trigonal lantern  $[Ag_6(\mu_3-F)(\mu_3-CF_3SO_3)_2]$ , and Tf denotes a pair of head-to-head triflate guest molecules.

Figure 2S. Perspective view of a cross-section normal to  $b$ , showing the accommodation of a dimeric  $(CF_3SO_3^-)_2$  guest species in a hexagonal cavity of a honeycomb-like layer. The host-guest  $Ag\cdots O$  interactions and  $F\cdots F$  contacts between adjacent layers are indicated by dotted lines.

Supporting Information

Figure 1S

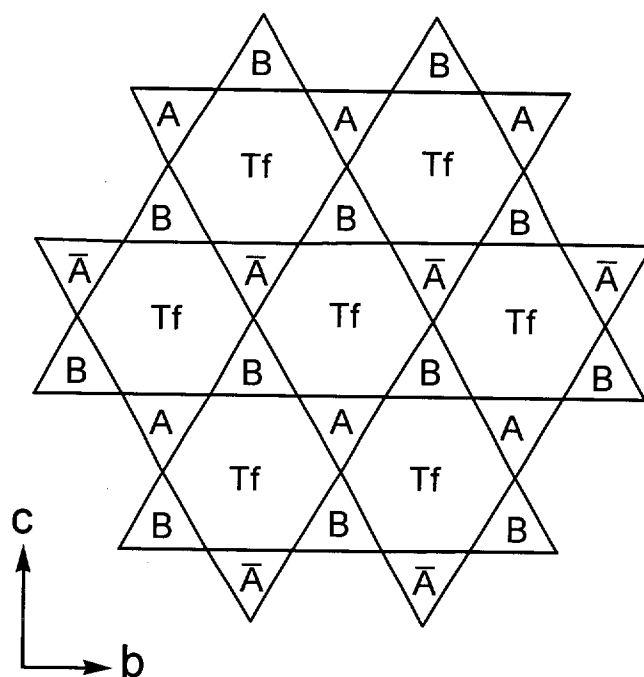

Figure 2S

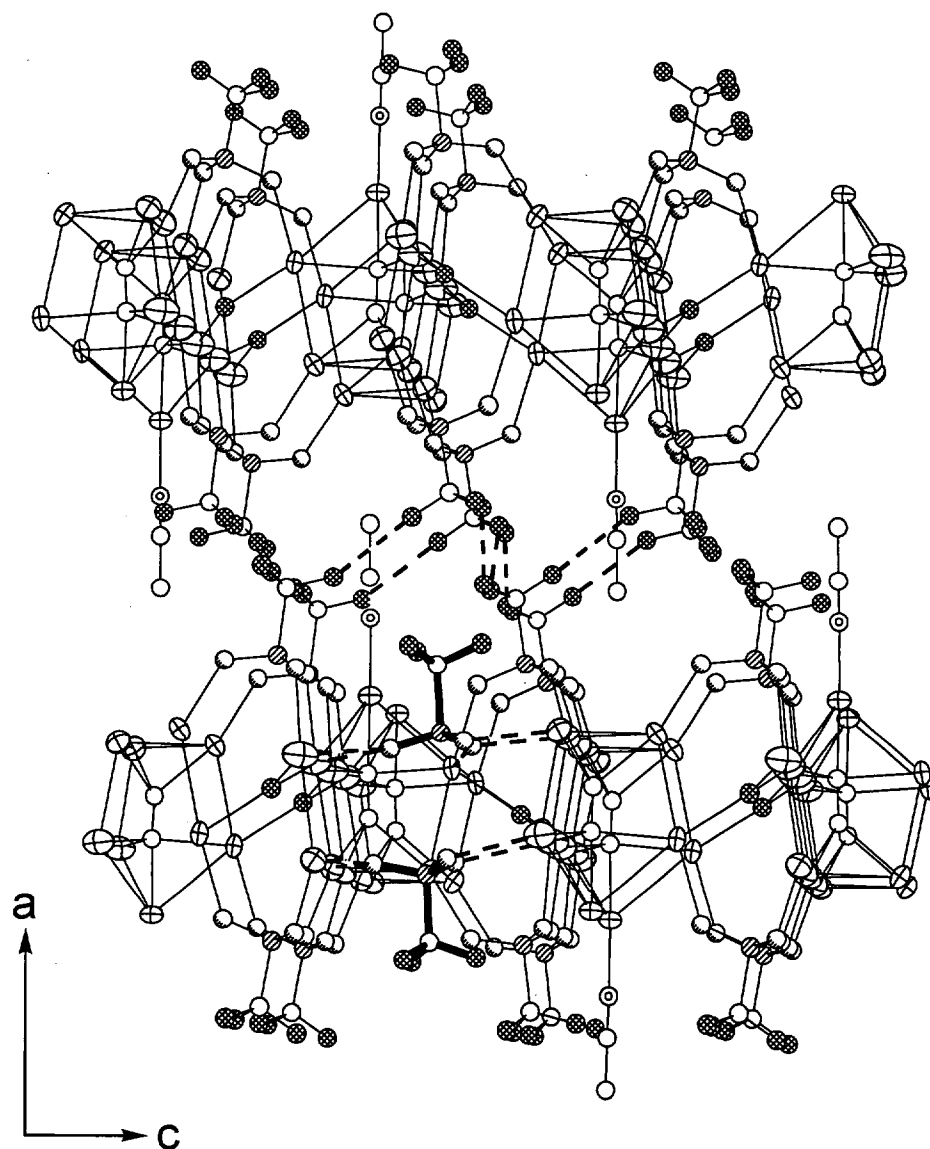

Supplement: Supplementary file 1 [file 5718051]
